# Supplementary material for: Direct stimulation of bone mass by increased GH signalling in the osteoblasts of Socs2−/− mice
Source: PubMed Central journal article supplement (PMC4166176; doi:10.1530/joe-14-0292), 2014-10
Supplement: supp_JOE-14-0292_Supplementary_Table_2.pdf [file supp_JOE-14-0292_Supplementary_Table_2.pdf]

**Supplementary Table 2** Primary antibodies and their dilutions used for western blotting and immunofluorescence.

| <b>Peptide/protein target</b>   | <b>Name of Antibody</b>             | <b>Species raised in; monoclonal or polyclonal</b> | <b>Dilution used</b> |
|---------------------------------|-------------------------------------|----------------------------------------------------|----------------------|
| <b>SOCS1</b>                    | SOCS1 (ab)                          | goat polyclonal                                    | 1 in 666             |
| <b>SOCS2</b>                    | SOCS2 (cs)                          | rabbit polyclonal                                  | 1 in 1000            |
| <b>SOCS3</b>                    | SOCS3 (ab)                          | rabbit polyclonal                                  | 1 in 369             |
| <b><math>\beta</math>-Actin</b> | $\beta$ -Actin (s)                  | mouse monoclonal                                   | 1 in 25,000          |
| <b>P-STAT1</b>                  | P-STAT1 (cs)                        | rabbit polyclonal                                  | 1 in 1000            |
| <b>STAT1</b>                    | STAT1 (cs)                          | rabbit polyclonal                                  | 1 in 1000            |
| <b>P-STAT3</b>                  | P-STAT3 (cs)                        | rabbit polyclonal                                  | 1 in 1000            |
| <b>STAT3</b>                    | STAT3 (cs)                          | rabbit polyclonal                                  | 1 in 1000            |
| <b>P-STAT5</b>                  | P-STAT5 (cs)                        | rabbit polyclonal                                  | 1 in 1000            |
| <b>STAT5</b>                    | STAT5 (cs)                          | rabbit polyclonal                                  | 1 in 1000            |
| <b>P-STAT 5</b>                 | P-STAT5 (tyr 694) (D47E7) (cs) (IF) | rabbit monoclonal                                  | 1 in 50              |
| <b>P-AKT</b>                    | P-AKT (cs)                          | rabbit polyclonal                                  | 1 in 1000            |
| <b>AKT</b>                      | AKT (cs)                            | rabbit polyclonal                                  | 1 in 1000            |
| <b>P-P44/42</b>                 | P-P44/42 MAPK (ERK1/2) (cs)         | rabbit polyclonal                                  | 1 in 1000            |
| <b>P44/42</b>                   | P44/42 MAPK (ERK1/2) (cs)           | rabbit polyclonal                                  | 1 in 1000            |

cs = Cell Signalling Technology (New England Biolabs, Hitchin, UK); s = Sigma; ab = Abcam (Cambridge, UK). (IF) = for immunofluorescence
